# Supplementary material for: Web-Based Signal Detection Using Medical Forums Data in France: Comparative Analysis
Source: PubMed Central journal article supplement (PMC6280030; doi:10.2196/10466), 2018-11-20
Supplement: jmir_v20i11e10466_app1.pdf [file jmir_v20i11e10466_app1.pdf]

**Multimedia Appendix 1.** List of medical forums included in the study.

|                 |                                                                                                                   |
|-----------------|-------------------------------------------------------------------------------------------------------------------|
| Atoute          | <a href="http://www.atoute.org/n/forum">www.atoute.org/n/forum</a>                                                |
| Doctissimo      | <a href="http://forum.doctissimo.fr/">http://forum.doctissimo.fr/</a>                                             |
| E-sante         | <a href="http://www.forum.e-sante.fr">www.forum.e-sante.fr</a>                                                    |
| SanteMedecine   | <a href="http://sante-medecine.commentcamarche.net/forum">http://sante-medecine.commentcamarche.net/forum</a>     |
| Onmeda          | <a href="http://www.onmeda.fr/forum/">http://www.onmeda.fr/forum/</a>                                             |
| Futura sciences | <a href="http://forums.futura-sciences.com/">http://forums.futura-sciences.com/</a>                               |
| Psoriasis       | <a href="http://www.forum-psoriasis.medicalistes.org/">www.forum-psoriasis.medicalistes.org/</a>                  |
| AlarmAsso       | <a href="http://alarme.asso.fr/forum/">http://alarme.asso.fr/forum/</a>                                           |
| Morphee         | <a href="http://morphee.forumpro.fr/">http://morphee.forumpro.fr/</a>                                             |
| Albi            | <a href="http://forum.albifrance.org/">http://forum.albifrance.org/</a>                                           |
| Renaloo         | <a href="http://www.renaloo.com/forum/">http://www.renaloo.com/forum/</a>                                         |
| Allodocteurs    | <a href="http://www.allodocteurs.fr/forums-et-chats/forums">http://www.allodocteurs.fr/forums-et-chats/forums</a> |
